# Supplementary material
Source: publisher figshare collection journal article supplement (https://acs.figshare.com/ndownloader/files/4259482)
Supplement: Supplementary file 1 [file 4259482]

# First-Principles study of water dissociation on PdZn near surface alloys

Yucheng Huang <sup>a,b</sup>, Zhao-Xu Chen <sup>a,\*</sup>

<sup>a</sup> *Institute of Theoretical and Computational Chemistry, Key Laboratory of Mesoscopic Chemistry of MOE, School of Chemistry and Chemical Engineering, Nanjing University, Nanjing, 210093, P.R. China*

<sup>b</sup> *School of Chemistry and Material Science, Anhui Normal University, Wuhu, 241000, P. R. China*

Table S1. The reaction heat and energy barrier for water dissociation on 221<sup>Pd</sup> step of PdZn(221) surface. Zero-point correction values are in parentheses.

|          | multilayer  |             | monolayer   |             |
|----------|-------------|-------------|-------------|-------------|
|          | $\Delta H$  | $E_a$       | $\Delta H$  | $E_a$       |
| monomer  | 0.62 (0.48) | 1.14 (0.95) | 0.28 (0.16) | 0.95(0.72)  |
| 1D-chain | 0.62 (0.44) | 1.14 (0.95) | 0.31 (0.14) | 0.90 (0.73) |

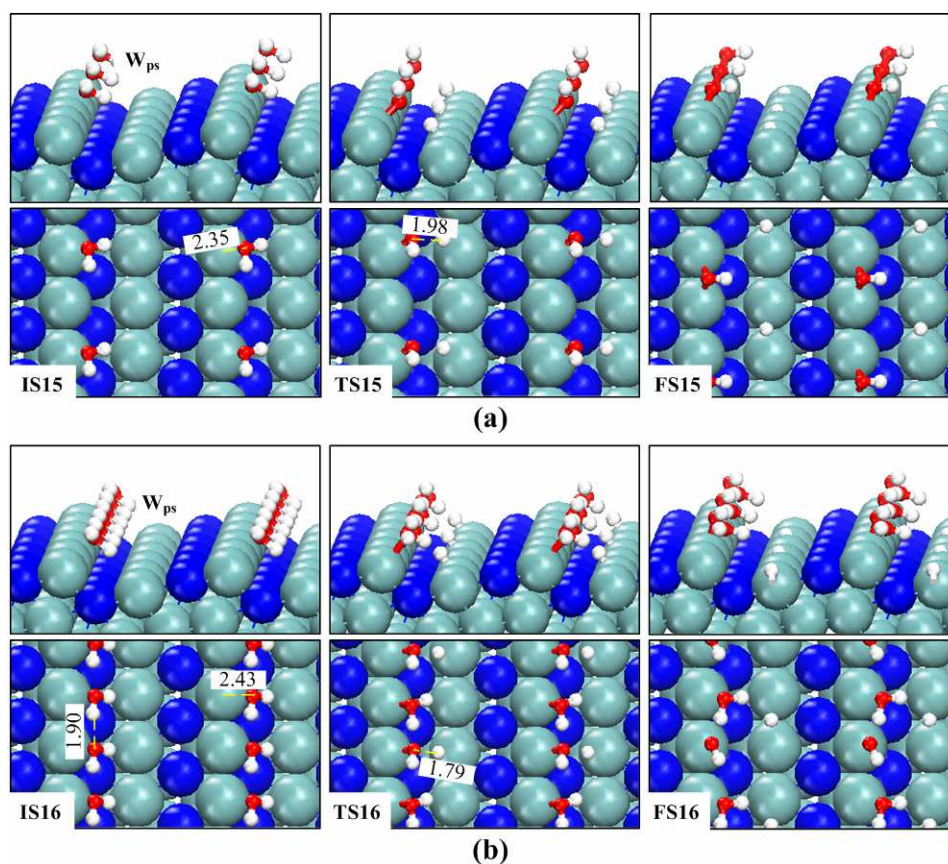

**Figure S1.** Structures of initial states, transition states and final states for water monomer (a) and 1D-chain (b) dissociation on 221<sup>Pd</sup> surface of PdZn multilayer. The upper/lower panel is the

\* Corresponding author. Fax: +86 2583593353.  
E-mail address: zxchen@nju.edu.cn

side/top view. Blue balls denote Zn atoms. The O-Zn and O-H bond length are in Å.

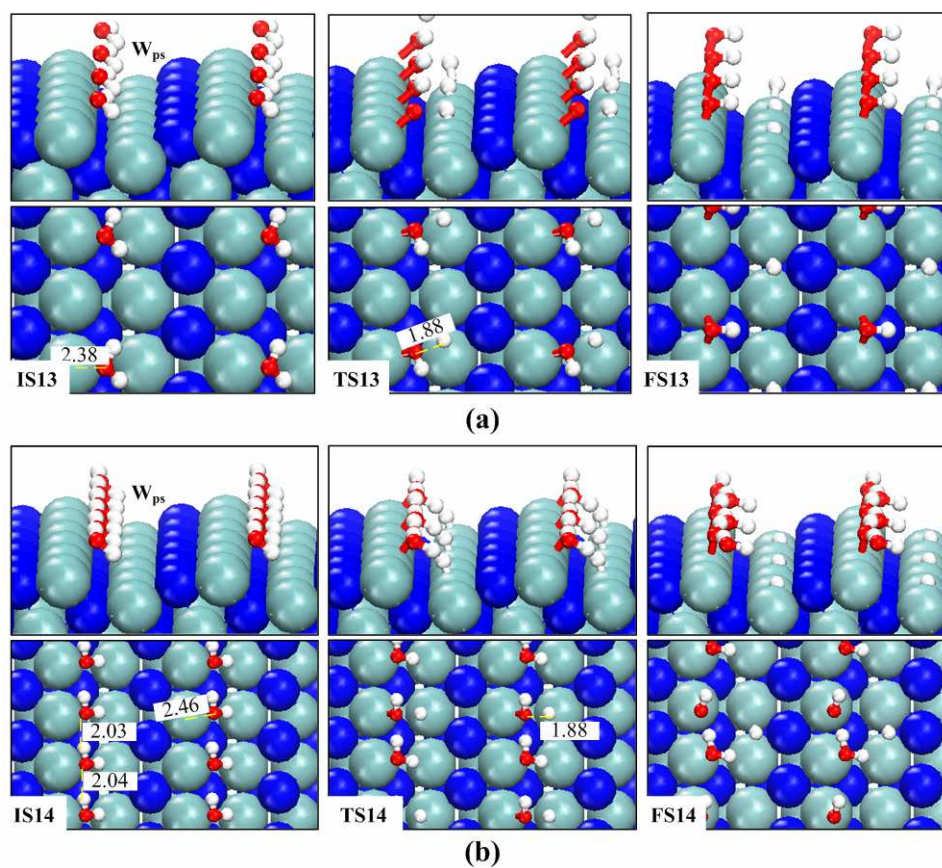

**Figure S2.** Structures of initial states, transition states and final states for water monomer (a) and 1D-chain (b) dissociation on  $221^{\text{Pd}}$  surface of PdZn monolayer. The upper/lower panel is the side/top view. Blue balls denote Zn atoms. The O-Zn and O-H bond length are in Å.
